# Supplementary material for: Mutation of Npr2 Leads to Blurred Tonotopic Organization of Central Auditory Circuits in Mice
Source: PubMed Central journal article supplement (PMC4256264; doi:10.1371/journal.pgen.1004823), 2014-12-04

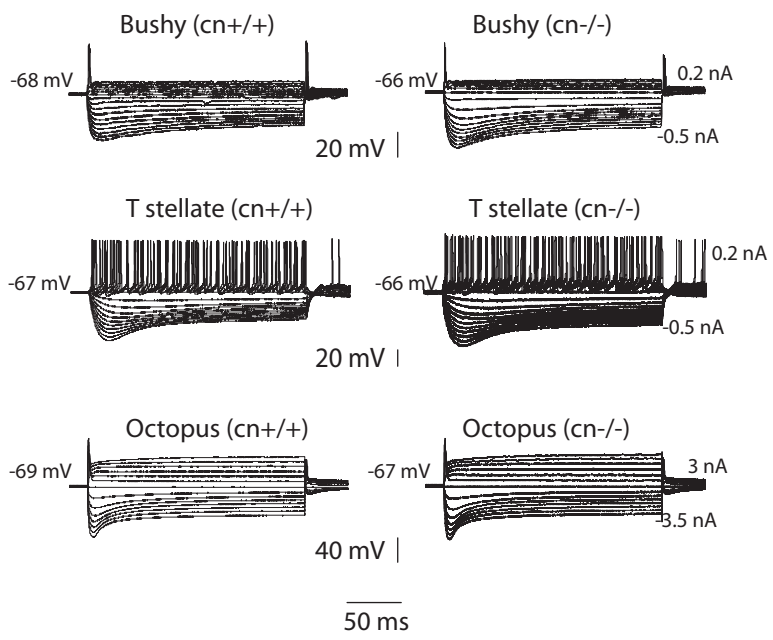

Supplement: pgen.1004823.s001.pdf [file pgen.1004823.s001.pdf]
